# Supplementary material for: Preserved in vitro immunoreactivity in children receiving long-term immunosuppressive therapy due to inflammatory bowel disease or autoimmune hepatitis
Source: Springer Nature journal article supplement (doi:10.1186/s40348-018-0079-0), 2018-01-19
Supplement: MOESM2 [file 15389948]

Table S2: Statistical tests and results

| <b>Subject</b>            | <b>Test</b>         | <b>Groups</b> | <b>Limits for significance</b> | <b>Value of H/z</b> | <b>significant yes/no</b> |
|---------------------------|---------------------|---------------|--------------------------------|---------------------|---------------------------|
| <b>lymphocyte numbers</b> | Kruskal-Wallis-Test | 1;2;3         | H>5,99                         | 3,11                | no                        |
| <b>T-cell numbers</b>     | Kruskal-Wallis-Test | 1;2;3         | H>5,99                         | 1,08                | no                        |
| <b>PHA</b>                | Kruskal-Wallis-Test | 1;2;3         | H>5,99                         | 3,06                | no                        |
| <b>PHA</b>                | Mann-Whitney-U-Test | 1+2;3         | z<-1,96 or z>1,96              | -1,75               | no                        |
| <b>tetanus antigen</b>    | Kruskal-Wallis-Test | 1;2;3         | H>5,99                         | 2,89                | no                        |
| <b>tetanus antigen</b>    | Mann-Whitney-U-Test | 1+2;3         | z<-1,96 or z>1,96              | -2,2                | yes                       |
| <b>adenovirus antigen</b> | Kruskal-Wallis-Test | 1;2;3         | H>5,99                         | 0,41                | no                        |
| <b>adenovirus antigen</b> | Mann-Whitney-U-Test | 1+2;3         | z<-1,96 or z>1,96              | -0,6                | no                        |
