# Supplementary material for: Preserved in vitro immunoreactivity in children receiving long-term immunosuppressive therapy due to inflammatory bowel disease or autoimmune hepatitis
Source: Springer Nature journal article supplement (doi:10.1186/s40348-018-0079-0), 2018-01-19
Supplement: MOESM3 [file 15389948]

Table S3: Data shown as indices from duplicates/triplicates

| <b>IS group</b> | <b>PHA index</b> | <b>Tetanus index</b> | <b>Adenovirus index</b> |
|-----------------|------------------|----------------------|-------------------------|
| 1               | 204,5            | 6,3                  | 2,7                     |
| 1               | 167,9            | 21,3                 | 214,3                   |
| 1               | 1002,0           | 0,7                  | 5,0                     |
| 1               | 264,0            | 15,6                 | 473,3                   |
| 1               | 301,1            | 1,8                  | 10,0                    |
| 1               | 142,0            | 12,8                 | 252,2                   |
| 1               | 954,8            | 2,3                  | 12,0                    |
| 1               | 1640,1           | 0,9                  | 15,3                    |
| 3               | 2674,1           | 132,2                | 61,0                    |
| 3               | 613,8            | 212,0                | 141,9                   |
| 1               | 505,3            | 90,9                 | 1,5                     |
| 1               | 4501,6           | 1,6                  | 5,0                     |
| 2               | 442,3            | 57,6                 | 5,1                     |
| 1               | 825,7            | 7,0                  | 1,7                     |
| 2               | 472,8            | 0,6                  | 8,3                     |
| 2               | 366,5            | 219,9                | 151,0                   |
| 1               | 238,1            | 27,0                 | 124,9                   |
| 3               | 295,1            | 13,3                 | 0,8                     |
| 2               | 133,7            | 230,7                | 37,2                    |
| 3               | 1011,3           | 1,6                  | 41,1                    |
| 2               | 512,4            | 0,8                  | 87,8                    |
| 1               | 305,7            | 1,7                  | 5,2                     |
| 2               | 441,3            | 2,0                  | 10,5                    |
| 2               | 1341,9           | 2,1                  | 90,2                    |
| 3               | 1010,9           | 268,0                | 114,3                   |
| 3               | 912,3            | 3,6                  | 3,7                     |
| 1               | 268,5            | 7,1                  | 266,4                   |
| 2               | 423,0            | 3,3                  | 91,3                    |
| 1               | 234,9            | 1,1                  | 117,3                   |
| 1               | 1012,2           | 0,7                  | 680,1                   |
| 1               | 752,8            | 4,2                  | 172,9                   |
